# Supplementary material for: Examining sleep deficiency and disturbance and their risk for incident dementia and all-cause mortality in older adults across 5 years in the United States
Source: publisher site journal article supplement (doi:10.18632/aging.202591), 2021-02-11
Supplement: Supplementary file [file aging-v13i3-202591-supplementary-material-SD1.pdf]

SUPPLEMENTARY FIGURE

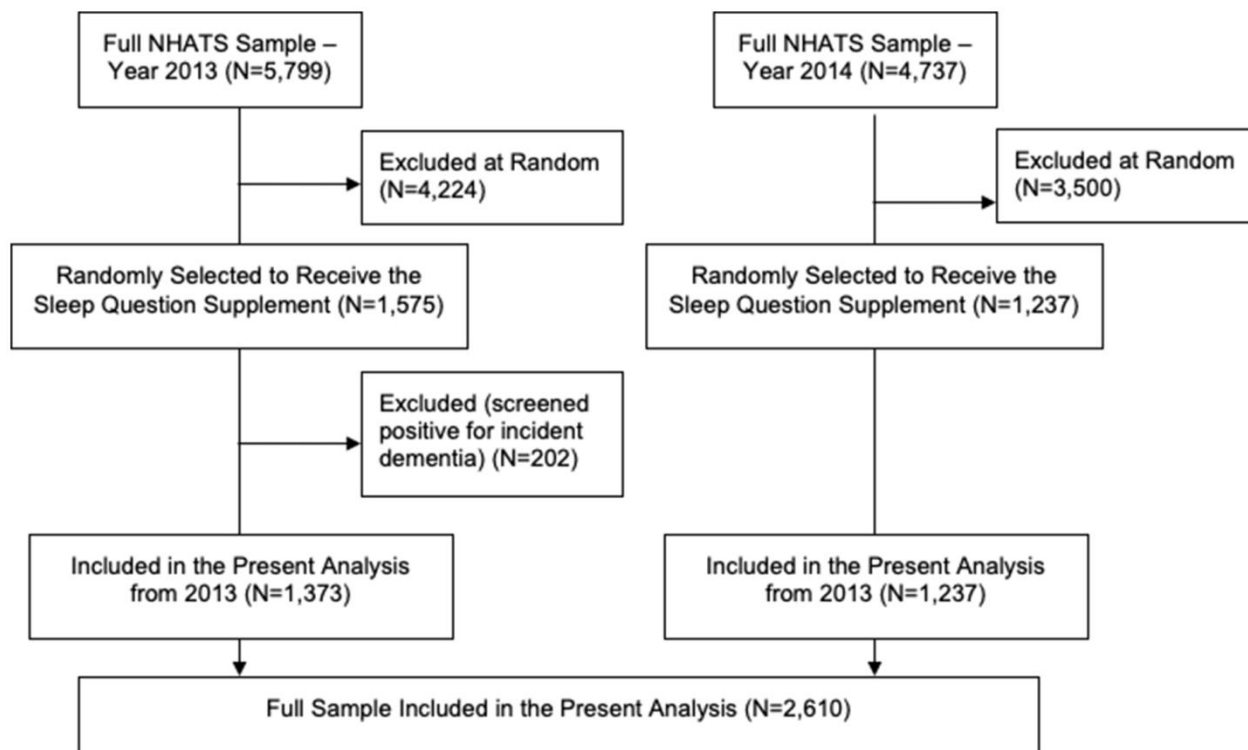

Supplementary Figure 1. Flow diagram outlining study participants.
